# Supplementary material for: Folate status, folate-related genes and serum miR-21 expression: Implications for miR-21 as a biomarker
Source: PubMed Central journal article supplement — BBA Clin. 2015 Jul 7;4:45–51. doi: 10.1016/j.bbacli.2015.06.006 (PMC4661713; doi:10.1016/j.bbacli.2015.06.006), 2015-07-07
Supplement: mmc1.pdf [file mmc1.pdf]

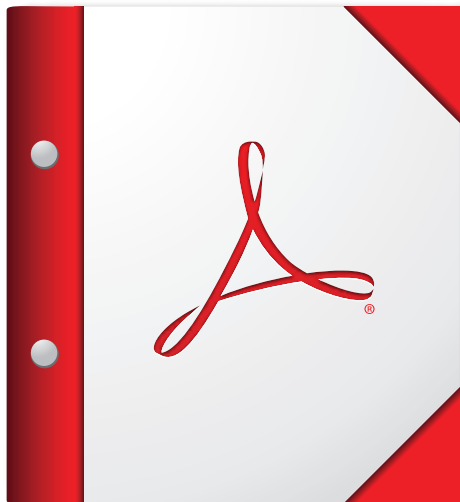

**For the best experience, open this PDF portfolio in  
Acrobat 9 or Adobe Reader 9, or later.**

[Get Adobe Reader Now!](#)
